# Supplementary material for: A Novel Microbial Dissolution - Reprecipitation Pathway for Biosintering of Limestone for Biocement Production
Source: Research Square preprint supplement (doi:10.21203/rs.3.rs-7268390/v1), 2025-09-02
Supplement: Supplementary file 1 [file 8ed5ed0241d7c1ed71512357.docx]

**
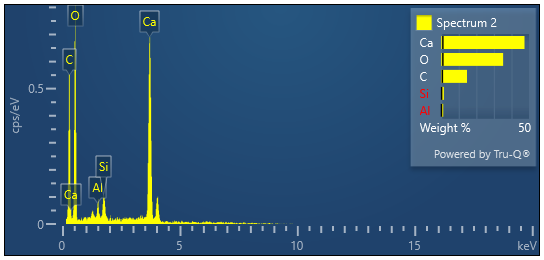
Fig. S1 Qualitative EDS spectrum of limestone powder and Biocement**

Qualitative EDS spectrum of limestone powder

**
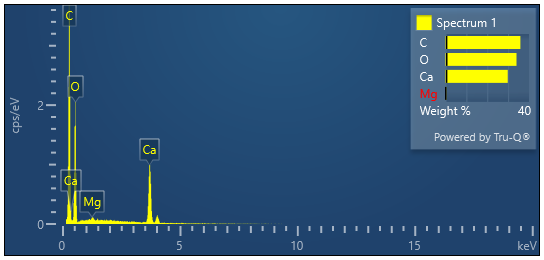
**

Qualitative EDS spectrum of biocement
